# Supplementary material for: Box-like gel capsules from heterostructures based on a core–shell MOF as a template of crystal crosslinking
Source: Royal Society of Chemistry journal article supplement (doi:10.1039/c7cc07158b), 2017-12-20
Supplement: c7cc07158b1.pdf [file c7cc07158b1.pdf]

*Electronic Supplementary Information for*

# Box-like gel capsule from heterostructure based on a core-shell MOF as template of crystal crosslinking

Takumi Ishiwata,<sup>a</sup> Ayano Michibata,<sup>a</sup> Kenta Kokado,<sup>a\*</sup> Sylvie Ferlay,<sup>b</sup> Mir Wais Hosseini,<sup>b</sup> and Kazuki Sada<sup>a\*</sup>

<sup>a</sup>Graduate School of Chemical Sciences and Engineering, and Faculty of Science, Hokkaido University, Kita 10, Nishi 8, Kita-ku, Sapporo, 060-0810 Japan

<sup>b</sup>Molecular Tectonics Laboratory, University of Strasbourg, UMR UdS-CNRS 7140, Institut Le Bel, 4, rue Blaise Pascal, 67000 Strasbourg France

## Experimental Section

|                                                                               |    |
|-------------------------------------------------------------------------------|----|
| Materials.                                                                    | S3 |
| Measurement.                                                                  | S3 |
| Preparation of <b>AzCS</b> .                                                  | S4 |
| Preparation of <b>CLCS</b> .                                                  | S4 |
| Preparation of <b>Box-gel</b> .                                               | S4 |
| Preparation of single crystal of $[\text{Zn}_4\text{O}(\text{Azbpdc})_3]_n$ . | S4 |

## Supplemental Figure

|                                                                                                               |     |
|---------------------------------------------------------------------------------------------------------------|-----|
| <b>Fig. S1</b> Photograph of the vial after preparation of <b>AzCS</b> .                                      | S5  |
| <b>Fig. S2</b> FT-IR spectra of <b>Core</b> , <b>AzCS</b> , <b>CLCS</b> and <b>Box-gel</b> .                  | S6  |
| <b>Fig. S3</b> Optical microscopy images of <b>Core</b> and <b>AzCS</b> .                                     | S7  |
| <b>Fig. S4</b> Optical microscopy images of <b>Core</b> and <b>AzCS</b> .                                     | S8  |
| <b>Fig. S5</b> XRD measurement of <b>AzCS</b> , <b>CLCS</b> and <b>Box-gel</b> .                              | S9  |
| <b>Fig. S6</b> Crystal structure of $[\text{Zn}_4\text{O}(\text{Azbpdc})_3]_n$ .                              | S10 |
| <b>Table S1.</b> Crystallographic data of $[\text{Zn}_4\text{O}(\text{Azbpdc})_3]_n$ .                        | S10 |
| <b>Fig. S7</b> $^1\text{H}$ -NMR spectra of $\text{D}_2\text{SO}_4/\text{DMSO}-d_6$ decomposing <b>CLCS</b> . | S11 |
| <b>Fig. S8</b> Optical microscopy image of <b>Box-gel</b> shrunk in water.                                    | S11 |
| <b>Fig. S9</b> Penetration test of <b>Box-gel</b> with fluorescent microbeads.                                | S12 |
| <b>References.</b>                                                                                            | S12 |

## **Experimental Section**

### **Materials**

**Azbpdc**<sup>1</sup> and tripropargylamine (**CL3N**)<sup>2</sup> were synthesized according to the reported procedures. All solvents and inorganic reagents were purchased from some commercial suppliers and were used without further purification. All experiments were carried out under ambient atmosphere. A dispersion of fluorescent microbeads (Fluoresbrite Plain Microsphere) was purchased from Polysciences, Inc.

### **Measurements**

Fourier transform infrared (FT-IR) spectra were obtained on a JASCO FT/IR-4100 spectrometer. X-ray diffraction (XRD) patterns were obtained by using a Bruker D8Advance with Cu K $\alpha$  radiation source (40 kV, 40mA). Optical micrographs were obtained by using a Nikon instruments SNZ1000 stereoscopic zoom microscope and Zeiss AxioCam ICc1. <sup>1</sup>H-NMR spectra were measured on a Bruker DRX-500MHz.. Scanning electron microscope (SEM) images were obtained by using a JEOL JIB-4600F/HKD.

### **X-ray Crystallography Analyses**

Single-crystal of [**Zn<sub>4</sub>O(Azbpdc)<sub>3</sub>**]<sub>n</sub> were mounted in the loop using paraffin oil. The data were collected on a Rigaku AFC-7R Mercury diffractometer with graphite monochromated Mo K $\alpha$  radiation (0.71069 Å) and a rotating-anode generator operating at 50 kV and 200 mA. Diffraction data were collected and processed using the CrystalClear program.<sup>3</sup> Structures were solved by direct methods using SHELXS-97.<sup>4</sup> Structural refinements were conducted by the full-matrix least-squares method using SHELXH-97.<sup>4</sup> Non-H atoms were refined anisotropically, and H atoms were refined using the riding model. All calculations were performed using the Yadokari-XG software package.<sup>5</sup>

### **Preparation of Core (IRMOF-9) single crystals**

The organic ligand **bpdc** (25 mg, 0.10 mmol) and  $\text{Zn}(\text{NO}_3)_2 \cdot 6\text{H}_2\text{O}$  (60 mg, 0.20 mmol) were dissolved in 5 mL of DMF in a screw top vial. The vial was kept standing at 80 °C for 3 days. The solution was decanted and cubic crystals were repeatedly washed with DMF.

### **Preparation of AzCS**

**Azbpdc** (25 mg, 70  $\mu\text{mol}$ ) and  $\text{Zn}(\text{NO}_3)_2 \cdot 6\text{H}_2\text{O}$  (60 mg, 200  $\mu\text{mol}$ ) were dissolved in 1 mL of DMF in a hydrophobized screw top vial. The vial was kept standing at 80 °C for 1 days. Then several single crystals of IRMOF-9 were immersed in the mixture and heated for 6 hours additionally. The solution was decanted and cubic core-shell crystals were repeatedly washed with DMF.

### **Preparation of CLCS**

250  $\mu\text{L}$  of saturated CuBr solution was added to 0.1 M tripropargylamine / DMF solution in a screw top vial. The mixture was standing at 80 °C for 1 day. At that time, brownish precipitate was dispersed in the solution. Then **AzCS** was immersed in the mixture and standing at 80 °C for 7 days. The solution was decanted and cubic core-shell crystals were repeatedly washed with DMF.

### **Preparation of Box-gel**

**CLCS** was immersed in a mixed solvent of 0.5 M  $\text{H}_2\text{SO}_4$  / DMSO in a screw top vial. The vial was kept standing at room temperature for 1 day. The supernatant was decanted, and yellow polymer gels were repeatedly washed with DMF.

### **Preparation of single crystals of $[\text{Zn}_4\text{O}(\text{Azbpdc})_3]_n$**

**Azbpdc** (25 mg, 70  $\mu\text{mol}$ ) and  $\text{Zn}(\text{NO}_3)_2 \cdot 6\text{H}_2\text{O}$  (60 mg, 200  $\mu\text{mol}$ ) were dissolved in 1 mL of DMF in a screw top vial. The vial was kept standing at 80 °C for 5 days. The solution was decanted and cubic crystals were repeatedly washed with DMF.

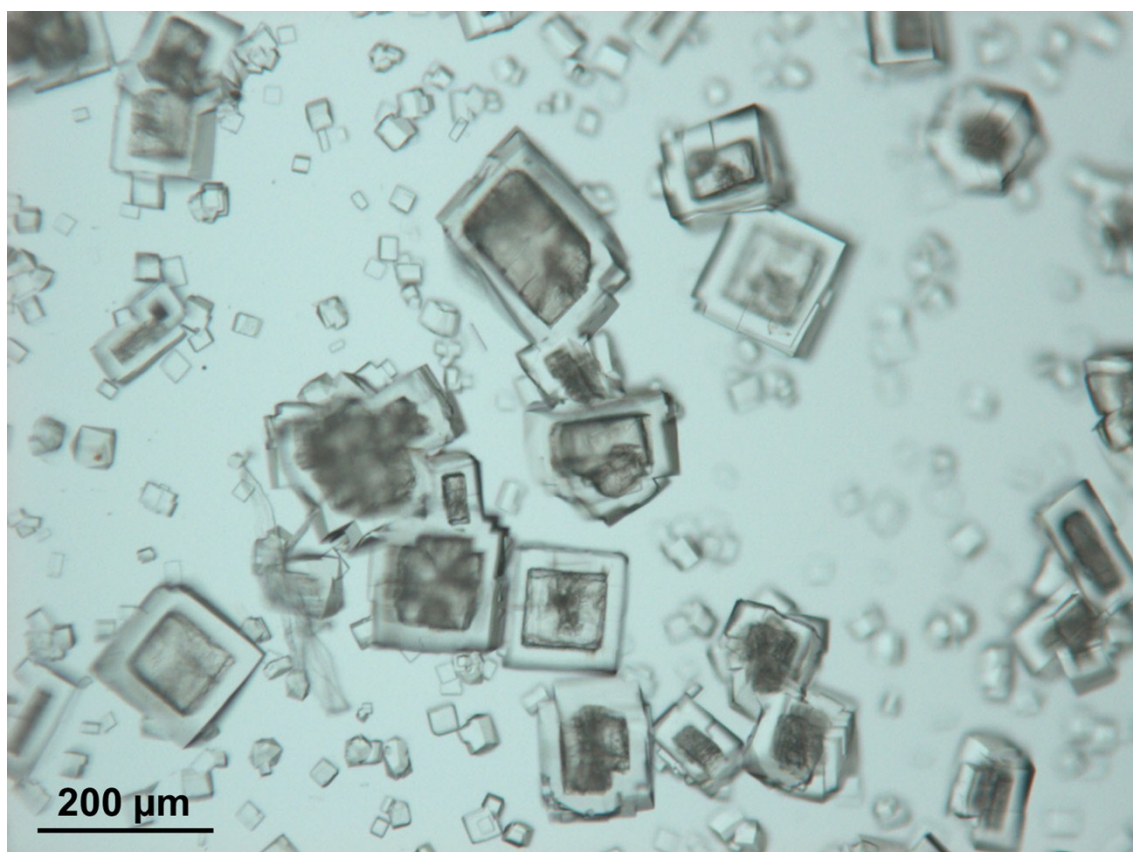

**Fig. S1** A photograph of vial after preparation of AzCS ( $[\text{Zn}_4\text{O}(\text{Azbpdc})_3]_n$  was manually removed).

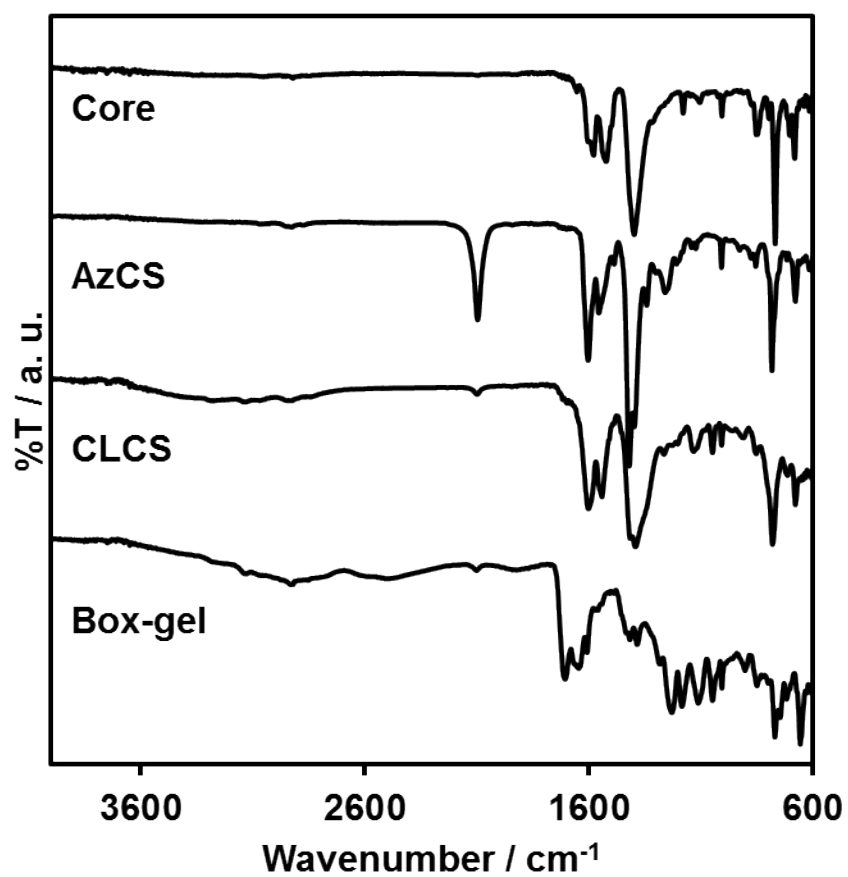

**Fig. S2** FT-IR spectra of **Core**, **AzCS**, **CLCS** and **Box-gel**.

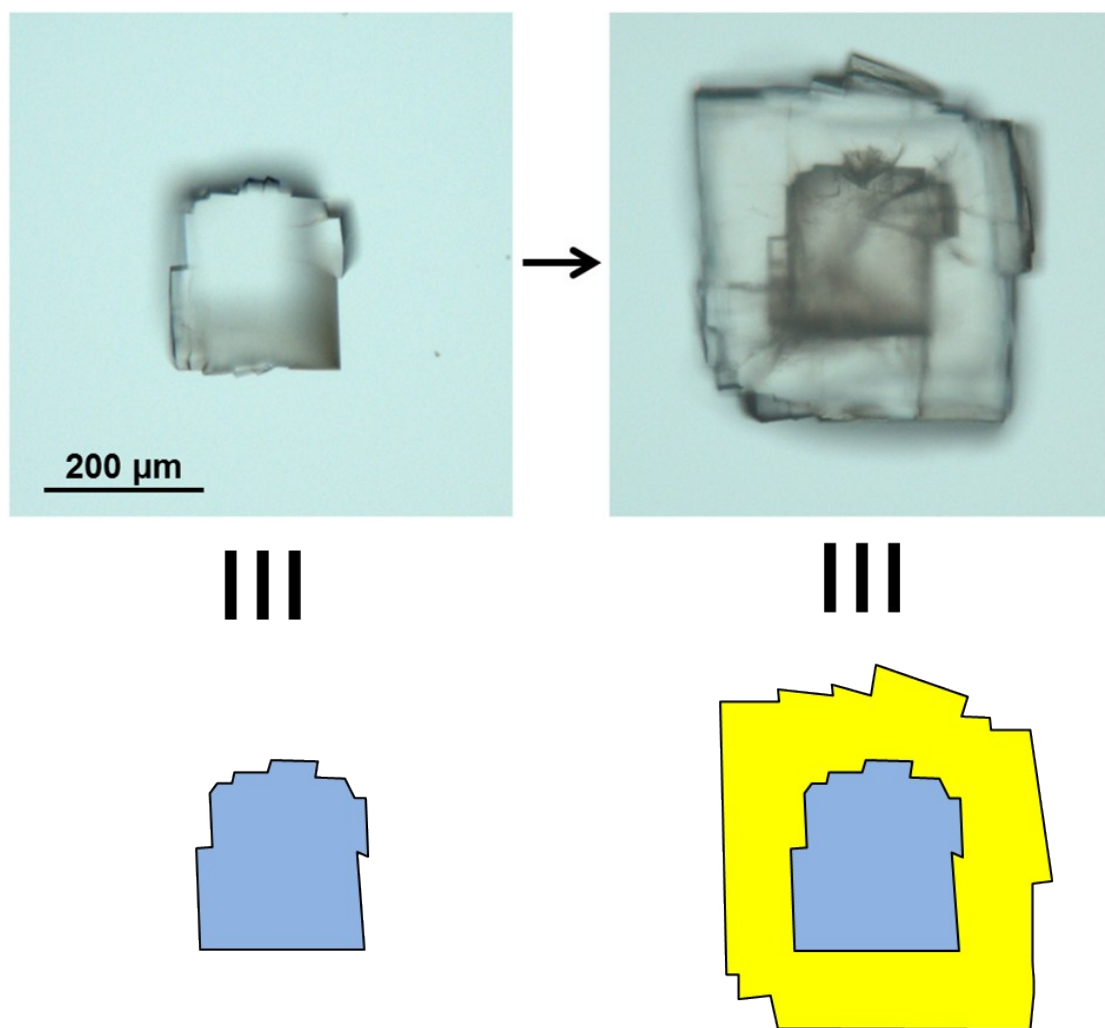

**Fig. S3** Optical microscopy images of **Core** and **AzCS** with unique shape. The shape of core did not change and constructed shell had similar shape with **Core**.

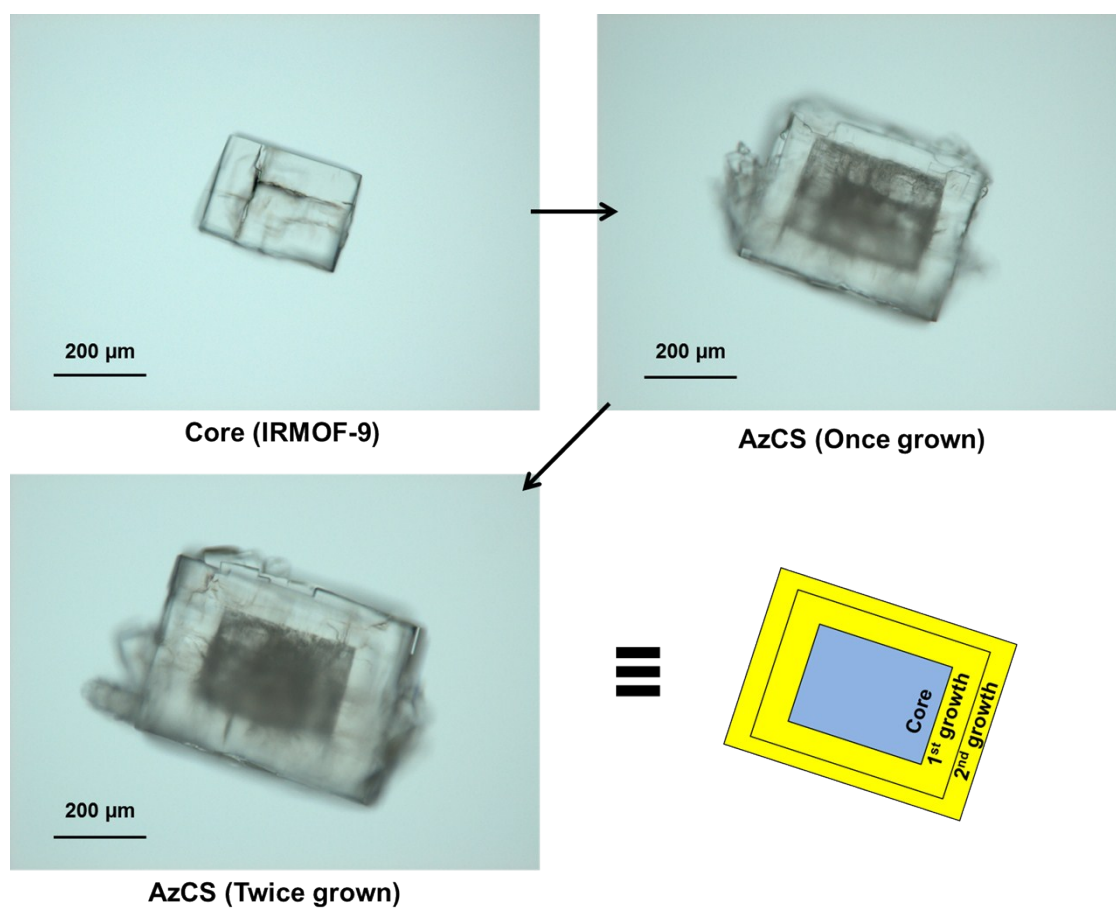

**Fig. S4** Optical microscopy images of core and AzCS. The shell thickness was increased with times of epitaxial crystal growth.



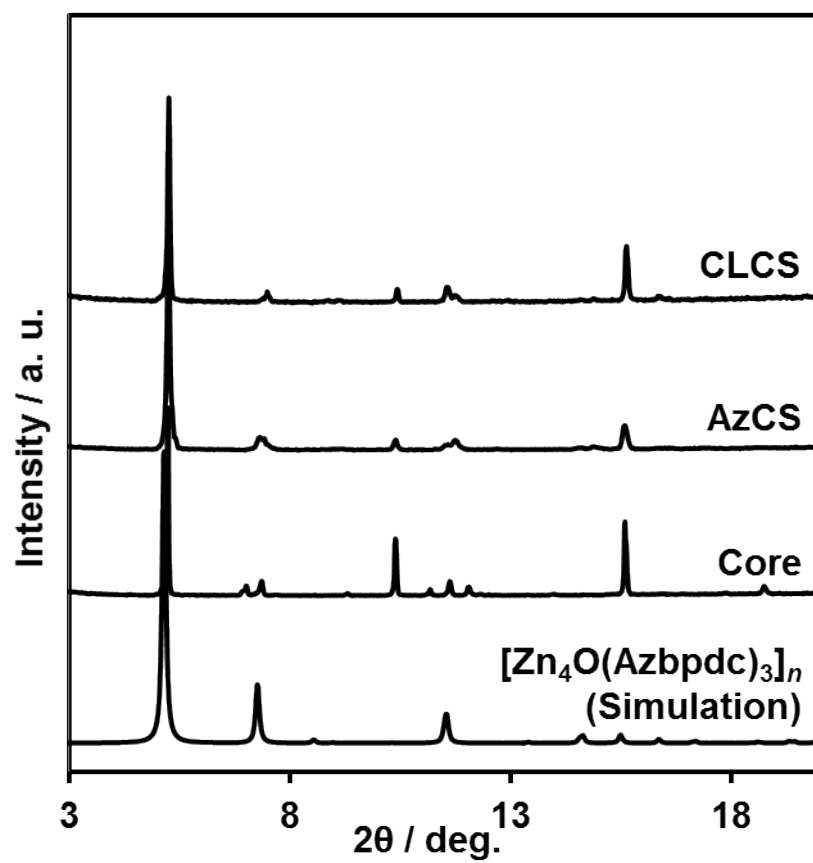

Fig. S5 XRD measurement of Core, AzCS, and CLCS.

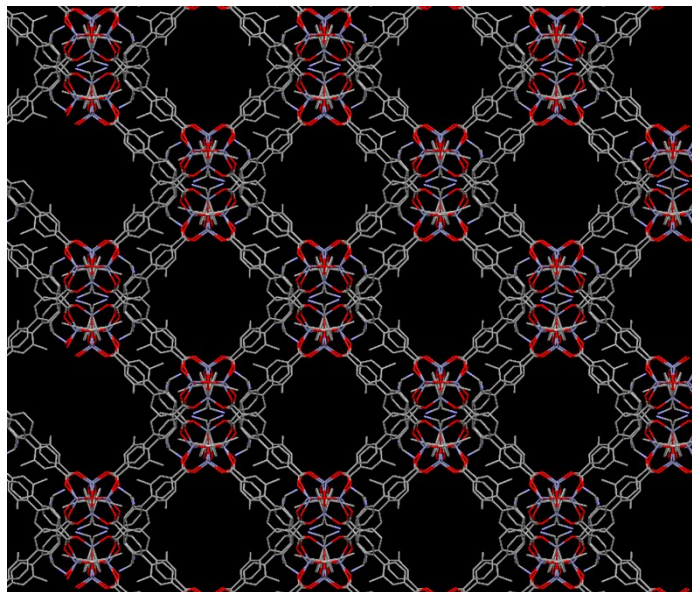

**Fig. S6** Crystal structure of  $[\text{Zn}_4\text{O}(\text{Azbpdc})_3]_n$  consisting of **Azbpdc** and Zn ions.

**Table S1.** Crystallographic data for  $[\text{Zn}_4\text{O}(\text{Azbpdc})_3]_n$ .

| Compounds           | $[\text{Zn}_4\text{O}(\text{Azbpdc})_3]_n$                                                                                         |
|---------------------|------------------------------------------------------------------------------------------------------------------------------------|
| Chemical formula    | $\text{C}_{48}\text{H}_{30}\text{N}_{18}\text{O}_{15}\text{Zn}_4$                                                                  |
| Crystal system      | Triclinic                                                                                                                          |
| Space group         | $P\bar{1}$                                                                                                                         |
| Unit cell dimension | 24.187(3) Å<br>24.1807(13) Å<br>24.292(2) Å<br>59.829(5) deg.<br>60.346(4) deg.<br>60.346(4) deg.<br>$V = 10075.1(15) \text{ Å}^3$ |
| Final $R$ indices   | $R_1 = 0.0791$                                                                                                                     |

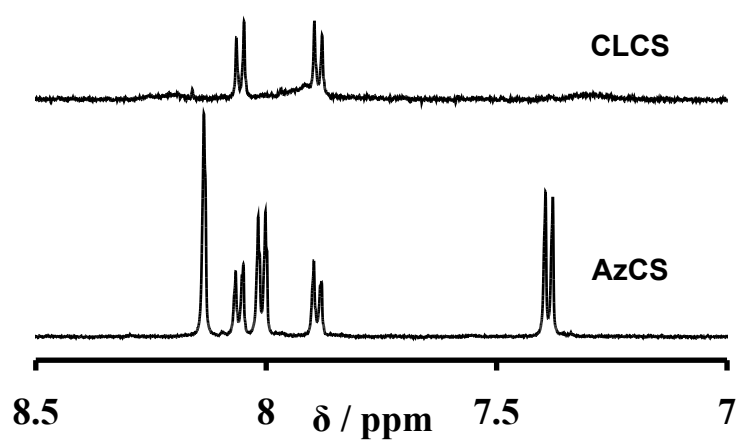

**Fig. S7**  $^1\text{H}$ -NMR spectra of AzCS and CLCS after digestion or extraction in  $\text{D}_2\text{SO}_4/\text{DMSO-}d_6$ .

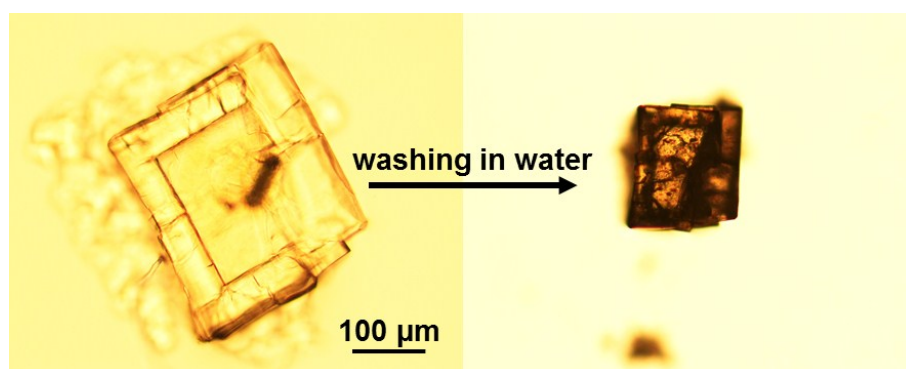

**Fig. S8** Optical microscopy image of **Box-gel** shrunk in poor solvent (water).

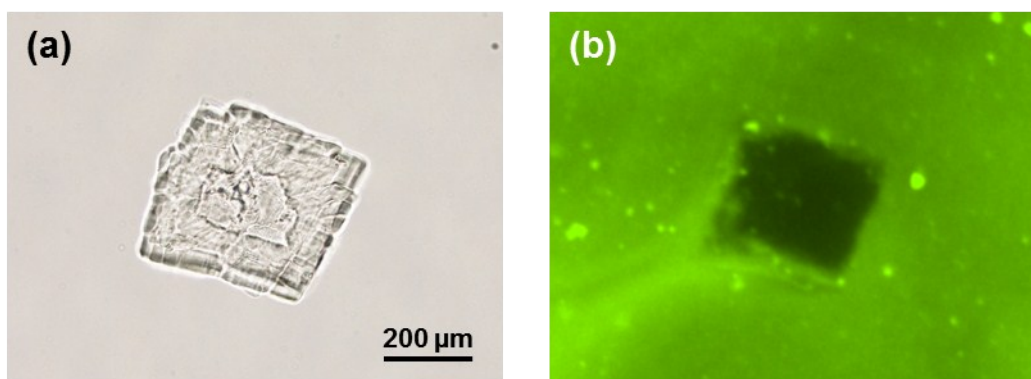

**Fig. S9** (a) A photograph of **Box-gel** immersed in DMF and (b) a fluorescent micrograph of the **Box-gel** immersed in a dispersion of fluorescent microbeads (diameter: 0.5  $\mu\text{m}$ ) in DMF.

## References

1. S. Nagata, H. Sato, K. Sugikawa, K. Kokado, K. Sada, *CrystEngComm* 2012, **14**, 4137–4141.
2. M. Schunack, M. Gragert, D. Döhler, P. Michael, W. Binder, *Macromol. Chem. Phys.* 2012, **213**, 205–214.
3. *CrystalClear*; Molecular Structure Corp.: Orem, UT, 2001.
4. *SHELX-97*; G. M. Sheldrick, *Acta Crystallogr., Sect. A: Found. Crystallogr.* 2008, **64**, 112–122.
5. *Yadokari-XG*; Program for Crystal Structure Analysis. Wakita, K. 2000.
